# Supplementary material for: The non-invasive exfoliated transcriptome (exfoliome) reflects the tissue-level transcriptome in a mouse model of NSAID enteropathy
Source: PubMed Central journal article supplement (PMC5665873; doi:10.1038/s41598-017-13999-5), 2017-10-31
Supplement: 41598_2017_13999_MOESM1_ESM.pdf [file 41598_2017_13999_MOESM1_ESM.pdf]

**The non-invasive exfoliated transcriptome (exfoliome) reflects the tissue-level transcriptome in a mouse model of NSAID enteropathy**

*Authors:* Canaan M. Whitfield-Cargile<sup>1</sup>, Noah D. Cohen<sup>1,5</sup>, Kejun He<sup>2</sup>, Ivan Ivanov<sup>3,5</sup>, Jennifer S. Goldsby<sup>4,5</sup>, Ana Chamoun-Emanuelli<sup>1</sup>, Brad R. Weeks<sup>6</sup>, Laurie A. Davidson<sup>4,5</sup>, Robert S. Chapkin<sup>4,5</sup>

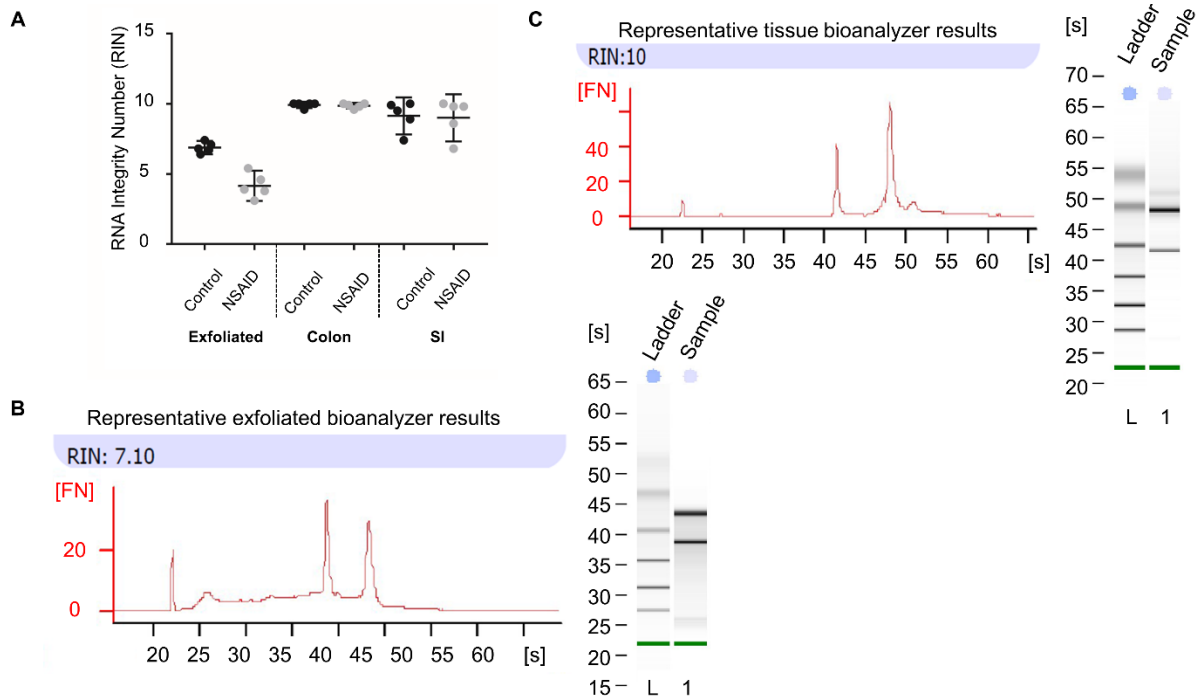

Supplementary Figure 1: Bioanalyzer results revealed lower quality total RNA in the exfoliome relative to the tissue due to partial RNAdegradation. **a** – Boxplots of RNA integrity number (RIN) from each dataset and treatment group. **b** – Representative Bioanalyzer results and virtual gel from exfoliated cell RNA. Note the presence of bacterial 23S and 16S ribosomal RNA. **c** - Representative Bioanalyzer results and virtual gel from tissue RNA (there were no differences between SI and colonic RNA). Note the presence of eukaryotic 28S and 18S ribosomal RNA.

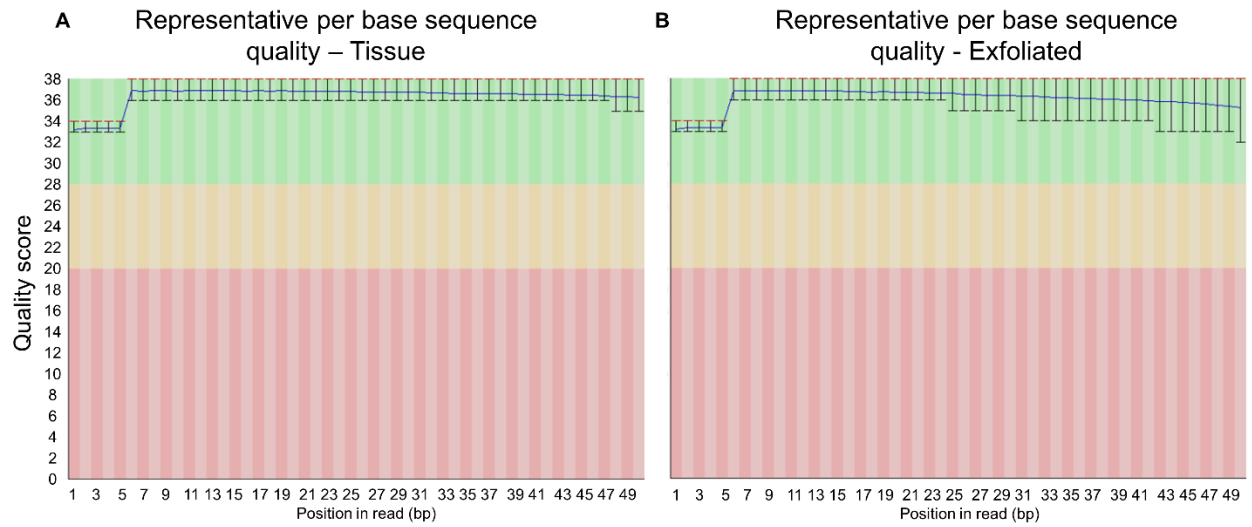

Supplementary Figure 2: FastQC results reveal similar per base sequence quality between exfoliated cell RNA and tissue RNA after sequencing. Representative per base quality scores for **(a)** exfoliated cell RNA and **(b)** colonic and SI tissue RNA after sequencing.

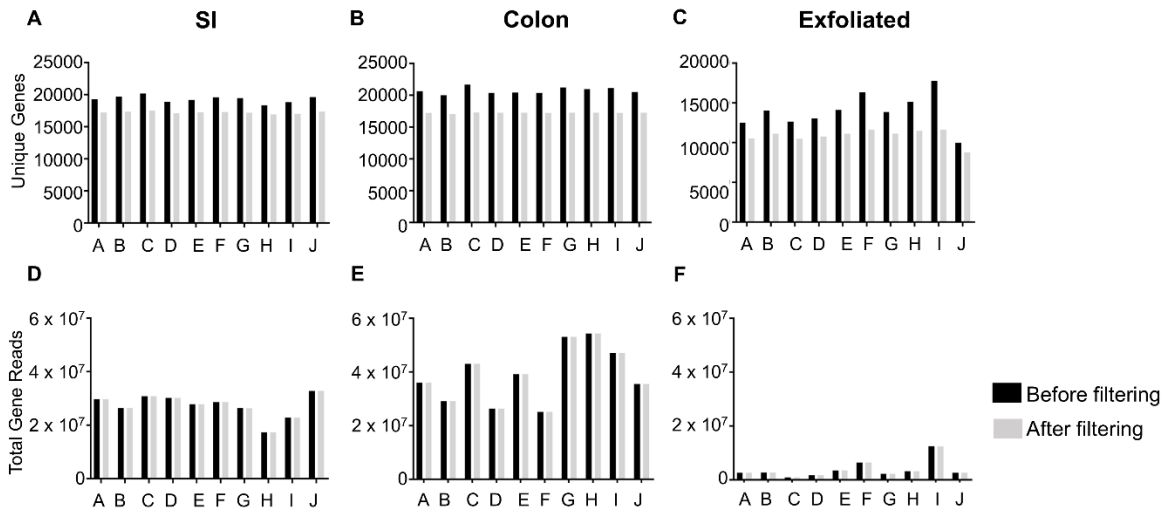

Supplementary Figure 3: Removing genes present in low abundance has minimal effect on numbers of unique genes or total gene reads in each sample across all treatment groups. Total number of unique genes present in each sample from the (a) SI transcriptome, (b) colonic transcriptome or (c) exfoliome before (black) and after (gray) removal of genes present in low abundance. Total number of reads present in each sample from the (d) SI transcriptome, (e) colonic transcriptome and (f) exfoliome before and after removal of genes present in low abundance.

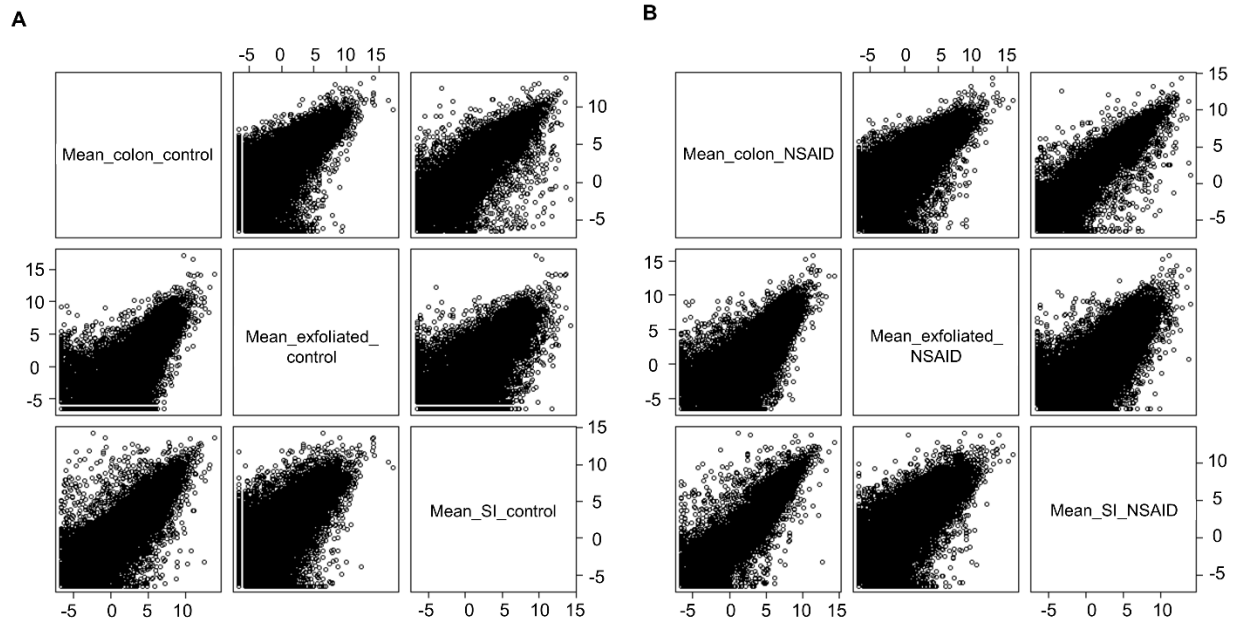

Supplementary Figure 4: Pairwise scatter plots of  $\log_2$  counts per million (CPM) for each gene in each treatment group (*i.e.*, NSAID and control) reveal correlation between all 3 datasets. Pairwise  $\log_2$  scatterplots between all 3 sources of data (*i.e.*, colon, exfoliated, and SI) where the average  $\log_2$  expression is plotted for each source within the (a) control groups and (b) NSAID group.

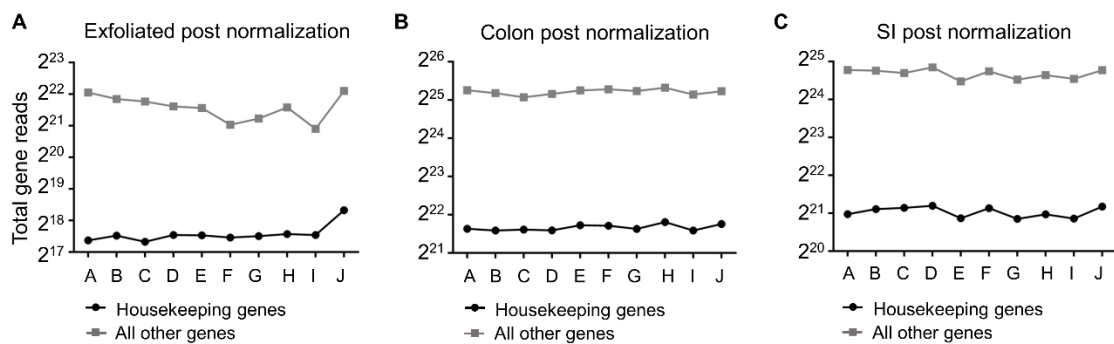

Supplementary Figure 5: log<sub>2</sub> total gene reads of 532 murine house-keeping genes (black) plotted against all other genes (grey) per sample for exfoliated cells (a), colonic mucosa (b), and SI mucosa (c) reveals analytical procedures effectively normalized for differences in library sizes.

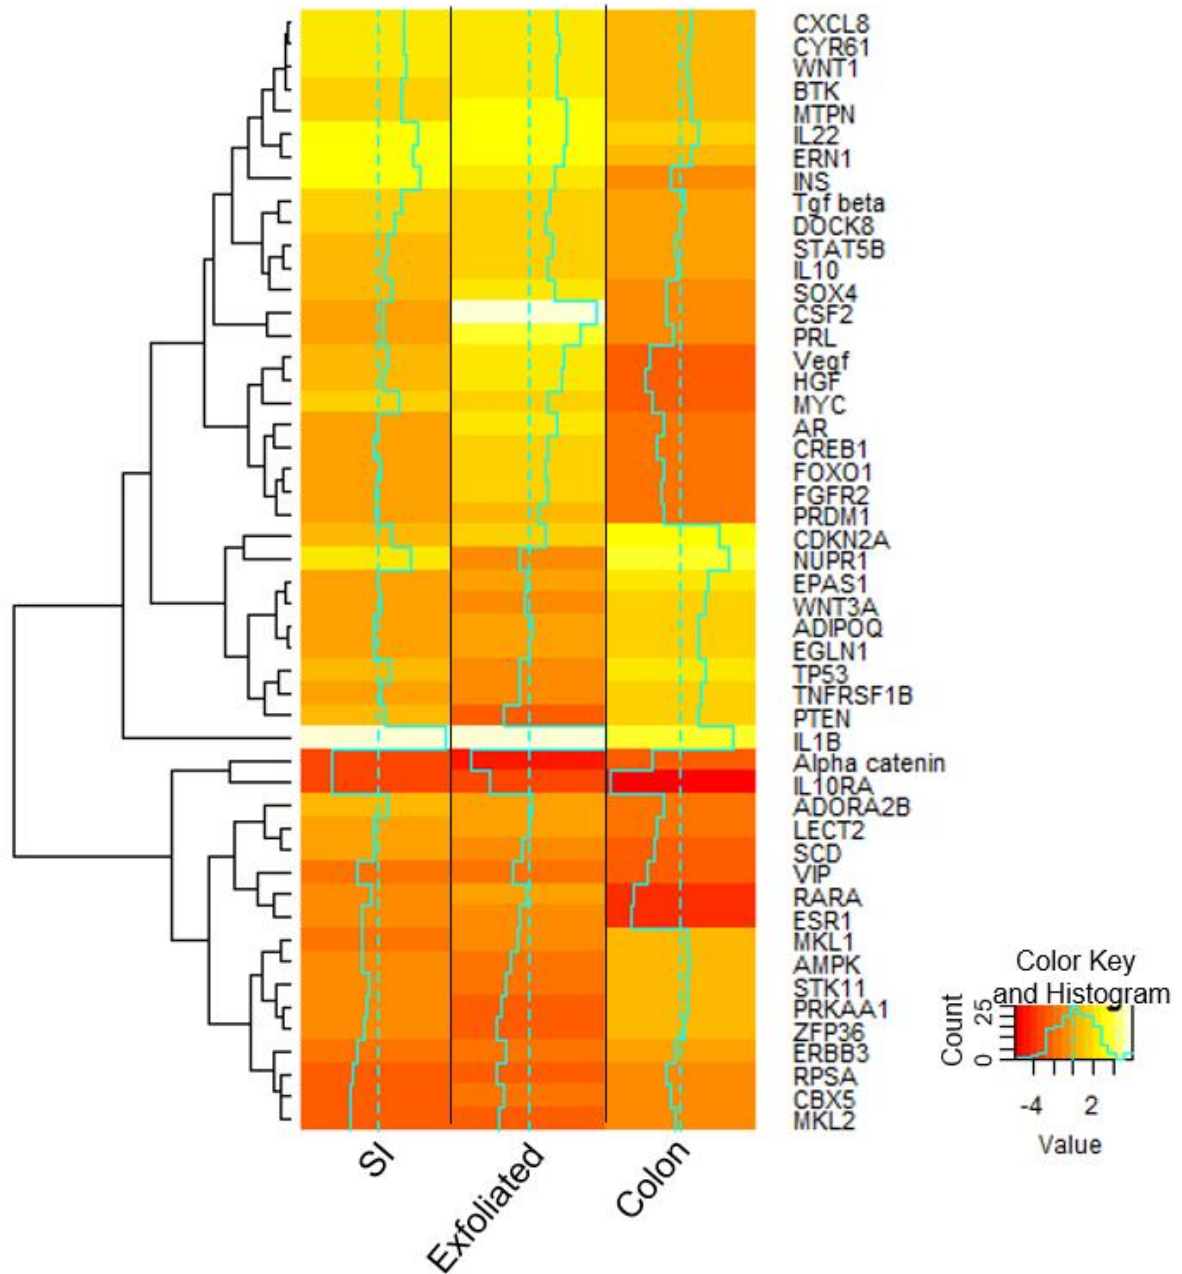

Supplementary Figure 6: Heatmap of genes identified as important upstream regulators of the canonical pathways shown in Figure 7. These data support the high degree of concordance between the SI transcriptome and exfoliome as compared with the colonic transcriptome.

| Cell markers                                                                                        | Gene name |
|-----------------------------------------------------------------------------------------------------|-----------|
| Crypt base columnar (CBC) cells                                                                     | Ascl2     |
|                                                                                                     | Lgr5      |
|                                                                                                     | Nr2e3     |
|                                                                                                     | Tnfrsf19  |
| Intestinal stem cell - CBC cells restricted                                                         | Aqp4      |
|                                                                                                     | Ascl2     |
|                                                                                                     | Cd44      |
|                                                                                                     | Cdca7     |
|                                                                                                     | Cdk6      |
|                                                                                                     | Clca4     |
|                                                                                                     | Kcnq1     |
|                                                                                                     | Msi1      |
|                                                                                                     | Nav1      |
|                                                                                                     | Smoc2     |
| Soat1                                                                                               |           |
| Intestinal stem cell signature –<br>Within the crypt with highest<br>expression at the crypt bottom | Afap1l1   |
|                                                                                                     | Agr3      |
|                                                                                                     | Cnn3      |
|                                                                                                     | Dach1     |
|                                                                                                     | Slc12a2   |
|                                                                                                     | Slco3a1   |
|                                                                                                     | Sorbs2    |
|                                                                                                     | Tns3      |
| Vdr                                                                                                 |           |
| Quiescent/+4 stem cell<br>markers expressed in<br>CBC cells                                         | Bmi1      |
|                                                                                                     | Hopx      |
|                                                                                                     | Lrig1     |
|                                                                                                     | Tert      |
| Transit Amplifying (TA) cells                                                                       | Axin2     |
|                                                                                                     | Ccnd1     |
|                                                                                                     | Cd44      |
|                                                                                                     | Myc       |
| Absorptive enterocytes                                                                              | Alpi      |
| Hormone secreting enteroendocrine                                                                   | Cck       |
|                                                                                                     | Chga      |
|                                                                                                     | Chgb      |
|                                                                                                     | Reg4      |
|                                                                                                     | Tac1      |
|                                                                                                     | Tph1      |



|                             |              |
|-----------------------------|--------------|
| Tuft cells                  | Cd24a        |
|                             | Dclk1        |
|                             | Krt8         |
|                             | Krt18        |
| Goblet cells                | Agr2         |
|                             | Clca3        |
|                             | Dll1         |
|                             | Dll4         |
|                             | Kit          |
|                             | Muc2         |
| Intestinal epithelial cells | Vil1         |
|                             | DSC2         |
|                             | Rab13        |
|                             | Tfr          |
|                             | Vil2         |
|                             | Epcam        |
| Neutrophils                 | Aqp9         |
|                             | sod2         |
|                             | il8RB/CXCR2  |
|                             | PBEF1        |
|                             | ly6g/Gr-1    |
|                             | CD20/Ms4a1   |
| B-Lymphocytes               | B220/PTPRC   |
|                             | CD74/HLA-DMA |
|                             | CEBPB        |
|                             | a-sma        |
| Smooth Muscle               | HOXA10       |
|                             | HNMT         |
|                             | sm22/tagln   |
|                             | f4/80 (EMr1) |
| Macrophages                 | cd14         |
|                             | cd68         |
|                             | CD86         |
|                             | Defa5        |
| Paneth cells                | Ang4         |
|                             | Nupr1        |
|                             | Gfi1b        |

Table S1: A list of the genes used as biomarkers for each cell type.

| Exfoliated    | SI        | Colon         |
|---------------|-----------|---------------|
| 4933431E20Rik | ADPRM     | 2010016I18Rik |
| ABCG5         | ANKRD37   | AGBL2         |
| Akap9         | ARF3      | AZGP1         |
| APAF1         | ATP8B1    | B230206H07Rik |
| APOBEC3B      | BCL2L15   | C5            |
| ARHGDIB       | CRYM      | Celf6         |
| ARNTL         | CTDSP1    | CLPS          |
| ATG10         | DOK4      | ENC1          |
| BTG1          | Fam187b   | KCTD12        |
| CDK8          | GCSAM     | KPNA2         |
| DEK           | HM13      | NDRG1         |
| DHX32         | KCTD5     | OLR1          |
| Dst           | KRBA1     | SLC2A10       |
| EPS8L3        | LRRC75A   | TPPP          |
| ESYT2         | LXN       | TRAF1         |
| ETS2          | NPTX1     | WLS           |
| GLTSCR1L      | NR1D1     | GM28373       |
| GNA13         | PLD2      |               |
| GRPEL2        | PPP2CB    |               |
| HLA-A         | PRUNE1    |               |
| IL15          | Qars      |               |
| INTS6         | RAPGEFL1  |               |
| KBTBD2        | REG4      |               |
| KIN           | SDR42E1   |               |
| LHFPL2        | SLC16A11  |               |
| LPP           | TBC1D10B  |               |
| MBNL2         | TRPM2     |               |
| MCEMP1        | TTC22     |               |
| MGEA5         | VGLL4     |               |
| MYSM1         | VNN1      |               |
| NHLRC2        | ZDHHC24   |               |
| NUAK2         | Rpl31-ps8 |               |
| PAPOLA        | GM14480   |               |
| PMP22         | GM9917    |               |
| PNRC1         |           |               |
| PPP1R12A      |           |               |
| PPP2R2A       |           |               |
| PRPF39        |           |               |
| RIN2          |           |               |
| SERINC2       |           |               |
| SLC34A2       |           |               |
| SLC35F5       |           |               |

|           |  |  |
|-----------|--|--|
| SPTBN1    |  |  |
| TNFAIP3   |  |  |
| TNFRSF11A |  |  |
| TNFRSF21  |  |  |
| TOR1AIP2  |  |  |
| TRAPPC8   |  |  |
| Rasgef1b  |  |  |

Table S2: Genes identified by LDA as being able to classify NSAID treated animals from control animals with less than 5% error.
